# Supplementary figures and images for: The Transcription Factor FoxK Participates with Nup98 To Regulate Antiviral Gene Expression
Source: PubMed Central journal article supplement — mBio. 2015 Apr 7;6(2):e02509-14. doi: 10.1128/mBio.02509-14 (PMC4453567; doi:10.1128/mbio.02509-14), 2015-04-07

# Supplemental Figure 1

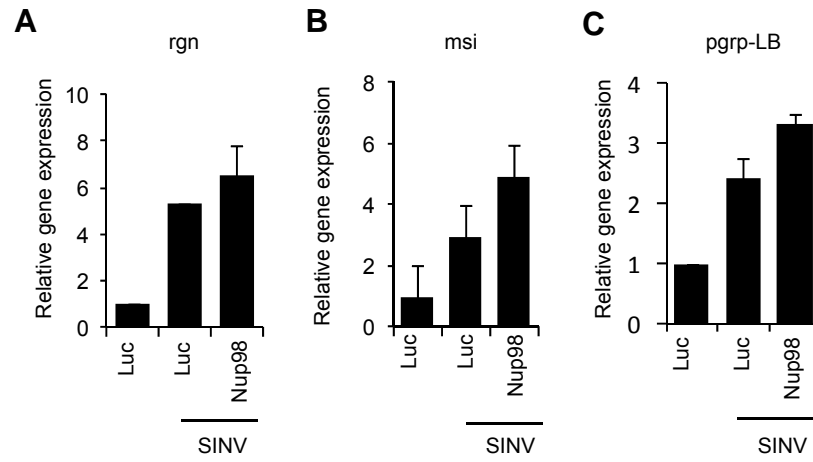

Supplement: mbo002152266sf1.pdf [file mbo002152266sf1.pdf]

## Supplemental Figure 2

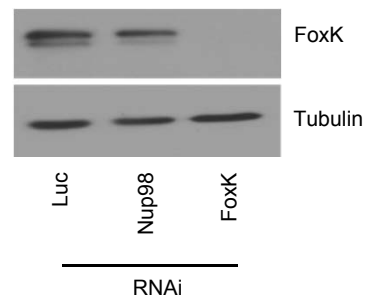

Supplement: mbo002152266sf2.pdf [file mbo002152266sf2.pdf]

### Supplemental Figure 3

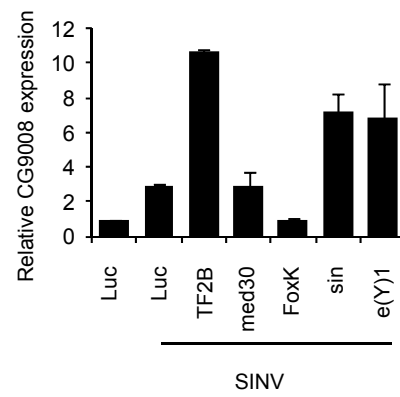

Supplement: mbo002152266sf3.pdf [file mbo002152266sf3.pdf]

## Supplemental Figure 4

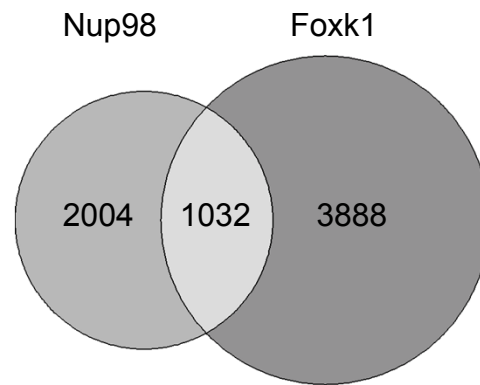

Supplement: mbo002152266sf4.pdf [file mbo002152266sf4.pdf]
